# Supplementary material for: Enantioselective Phytotoxicity of the Herbicide Imazethapyr on the Response of the Antioxidant System and Starch Metabolism in Arabidopsis thaliana
Source: PubMed Central journal article supplement (PMC3089624; doi:10.1371/journal.pone.0019451), 2011-05-06
Supplement: pone.0019451.s004.pdf [file pone.0019451.s004.pdf]

**Enantioselective Phytotoxicity of the Herbicide Imazethapyr on the Response of the Antioxidant System and Starch Metabolism in *Arabidopsis thaliana***

Haifeng Qian, Tao Lu, Xiaofeng Peng, Xiao Han, Zhengwei Fu, and Weiping Liu

**SUPPLEMENTARY DATA**

**Table S1.** Primer sequences used in the real time qPCR analysis.

| Gene name | Primer sequence                                                 | Genbank<br>accession no. |
|-----------|-----------------------------------------------------------------|--------------------------|
| Actin 2   | F:ACCTTGCTGGACGTGACCTTACTGAT-3<br>R:GTTGTCTCGTGGATTCCAGCAGCTT-3 | Genbank :<br>NO.U41998.1 |
| CSD1      | F:TCCATGCAGACCCTGATGAC<br>R:CCTGGAGACCAATGATGCC                 | NM_100757.3              |
| CSD2      | F:CATTCTCATCTCCTTCTCG<br>R:GATTGGAGACGGTGGAGAT                  | NM_128379.3              |
| CSD3      | F:ACTGATGGAAGCTCCTAGA<br>R:GCCAGGAGAGAGTCCTGAGAT                | NM_001125773.1           |
| FSD1      | F:CTCCCAATGCTGTGAATCCC<br>R:TGGTCTTCGGTTCTGGAAGTC               | NM_179110.2              |
| FSD2      | F:GGAACCGCATATGAGCCGGGAAACC<br>R:CTTGTCTTCCTCCTTTGGGAGAGG       | NM_124489.2              |
| FSD3      | F:GGTGGTTTAAAGGTTGAAGCTTACTACGG<br>R:CCTTATCAATCTGCTCAAGAACACCC | NM_122237.3              |
| MSD1      | F:ATGTTTGGGAGCACGCCTAC<br>R:AACCTCGCTTGCATATTTCCA               | NM_111929.3              |
| CAT1      | F:AAGTGCTTCATCGGGAAGGA<br>R:CTTCAACAAAACGCTTCACGA               | NM_101914.3              |
| APX1      | F:TGCCACAAGGATAGGTCTGG                                          | NM_001123772.1           |

---

|      |                                                              |             |
|------|--------------------------------------------------------------|-------------|
|      | R:CCTTCCTTCTCTCCGCTCAA                                       |             |
| APX2 | F:TGATGTGAAGACGAAGACAGGAGGAC<br>R:CCCATCCGACCAAACACATCTCTTA  | NM_111798.3 |
| APX3 | F:CCCAAATCACATACGCAGACCTGTA<br>R:AGTTGTCAAACCTTCAGCGGCTCTTG  | NM_119666.3 |
| APX4 | F:CTACTAAATCCGGGGGAGCCAATG<br>R:CTCTGTTGCATCACTCCTTCCAAAAT   | NM_116970.3 |
| APX5 | F:AGCTAAACCGTCCACACAACAAAGGT<br>R:GTCCCAAAGTGTGACCTCCAGAGAGA | NM_119763.2 |
| APX6 | F:TGCAAAACGAAATAAGGAAAGTGGTG<br>R:CACTCAGGGTTTCTGGAGGTAGCTTG | NM_119384.4 |
| GPX1 | F: CAGGAGGATTCTTGGGTGGTC<br>R: TTCTCGATTTGGAAAGGGGAT         | NM_128065   |
| GPX2 | F: AAATGTGGTCTGACGGATGC<br>R: CATTGTTTCTGGTTCTTGTC           | NM_128714   |
| GPX3 | F: AGTCAAGAGCCAGGCAGCAA<br>R: GCATCCCCAAACAATCCTCC           | NM_129896   |
| GPX4 | F: GGGAAAGTCCTCCTCATCGTC<br>R: GTGCCGGGCTCCTGGTATA           | NM_130382   |
| GPX5 | F: GGAAAGTGCTGCTCGTCGTC<br>R: GCAAGGAAACGCCAATACCA           | NM_116173   |
| GPX6 | F: GCTCTTTGGAGACGGCATT<br>R: AGGTGAGGTAGTTGGTGCGA            | NM_117229   |
| GPX7 | F: ACACCCTTCAATGGTTTCGC<br>R: CTGAAACCCATTACTCGGAT           | NM_119337   |
| GPX8 | F: CAGTGAGAAATGGCGACGAA<br>R: CCCACATTTGGAAGCAACATT          | NM_105025   |

---
